# Supplementary material for: Transgene-free genome editing in marine algae by bacterial conjugation – comparison with biolistic CRISPR/Cas9 transformation
Source: PubMed Central journal article supplement (PMC6158232; doi:10.1038/s41598-018-32342-0), 2018-09-26
Supplement: 41598_2018_32342_MOESM1_ESM.pdf [file 41598_2018_32342_MOESM1_ESM.pdf]

1 Supplementary information.

2 Transgene-free genome editing in marine algae by bacterial conjugation – comparison with  
3 biolistic CRISPR/Cas9 transformation.

4 Sharma AK<sup>1</sup>, Nymark M<sup>1</sup>, Sparstad T<sup>1</sup>, Bones AM<sup>1</sup>, Winge P<sup>1</sup>.

5 1. Cell, Molecular biology and Genomics Group, Department of Biology, Norwegian University  
6 of Science and Technology, N-7491 Trondheim, Norway.

7 **Supplementary Figure 1. Schematic illustration of the pPtPuc3m diaCas9\_sgRNA plasmid.**

8 Important elements of the episomal plasmid pPtPuc3m\_diaCas9\_sgRNA: diaCas9 (brown) under regulation of  
9 LHCF2 promoter and LHCF1 terminator (grey), sgRNA (red) regulated by U6 promoter (yellow), target region  
10 (green), zeocin resistance cassette (black), origin of transfer (oriT; pink), CEN/ARS (dark grey).

11 **Supplementary Figure 2. Overview of CRISPR-induced targeted mutations in the Myb1R\_SHAQKYF5 gene**  
12 **identified in primary colonies.** Different types of mutations at the targets sites Myb PAM1 and Myb PAM2 present  
13 in primary colonies by using either pKS\_diaCas9\_sgRNA for biolistic bombardment or pPtPuc3m\_diaCas9\_sgRNA  
14 for bacterial conjugation. C is used as an abbreviation for colony number. The target sequence is shown in green  
15 with PAM sequence in brown font. Indels are shown in red font.

16

17 **Supplementary Figure 3: Experimental design for generating non-transgenic mutant lines.** Mutant lines  
18 originating from single cells were grown in the absence of antibiotics for 16 days during which they were 100-fold  
19 diluted after 7 days. After 16 days, cells were 1000-fold diluted, and 200 µl from the cultures were plated to obtain  
20 single colonies on non-selection plate. Colonies could be picked after three weeks. Cells from 25 randomly chosen  
21 colonies were patched onto a new non-selection plate in a grid pattern. After five days randomly selected colonies  
22 were re-patched on non-selection plate and selection plate. Verification of non-transgenic cells was done by PCR.

23 **Supplementary Figure 4. Sequence for pPtPuc3m\_diaCas9\_sgRNA from 5' end. oriT.** Colour coding used:  
24 BleoR, CEN/ARS, LHCF2 Promoter, diaCas9, LHCF1 terminator, U6promoter, sgRNA, U6 3' prime region,  
25 kanR

26 **Supplementary figure 5:** Plasmid rescue of pPtPuc3m\_diaCas9\_sgRNA episome from transformed *P.*  
27 *tricornutum* lines. Plasmid rescue was performed using genomic DNA from pure mutant lines containing  
28 pPtPuc3m\_diaCas9\_sgRNA episome and used to transform *E. coli* Dhα. 150-200ng of isolated plasmid  
29 DNA was linearized using XbaI restriction enzyme and separated by agarose gel electrophoresis. Lanes  
30 marked with L indicate 1-kb plus ladder (Fermentas) and with PL indicate pPtPuc3m\_diaCas9\_sgRNA  
31 plasmid as control. CON with number indicate colonies generated using bacterial conjugation and A-E  
32 represent 5 plasmids isolated from 5 random *E. coli*.

33 **Supplementary Table 1: List of polymorphisms used to differentiate alleles for the MYB1R\_SHAQKYF5**  
34 **gene.** Pt\_Myb (XM\_002181623) sequence is used as a reference gene, and the numbers represent the position of the  
35 nucleotide in the reference gene.

36 **Supplementary Table 2: List of primers used in the experiments.**

37

38

39

40

41

42

43 **Supplementary Figure 1**

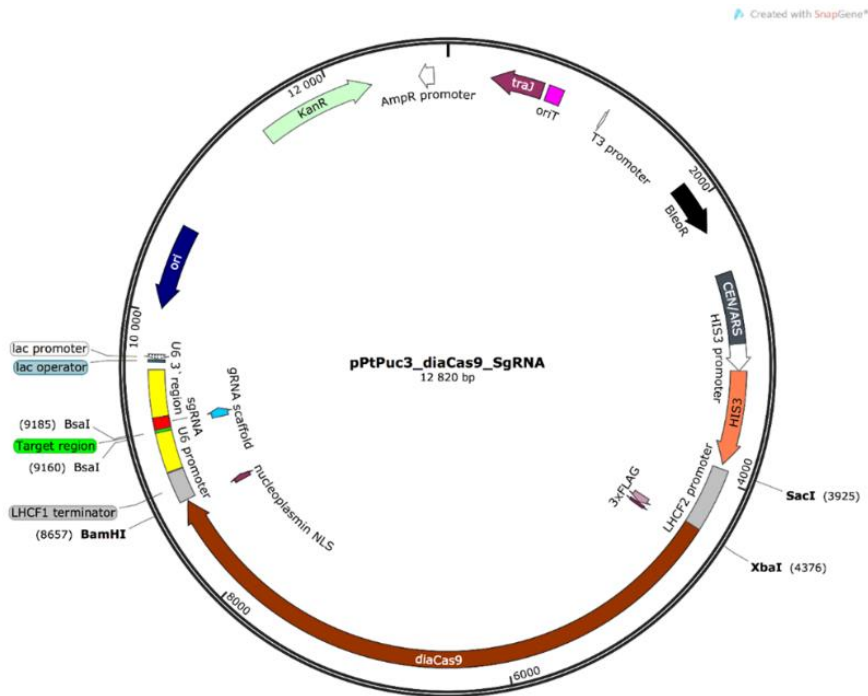

44

45

46

47

48 **Supplementary Figure 2**

49

| Strain               | WT                                                                                            | WT                                                                                           | WT                                                                                  |
|----------------------|-----------------------------------------------------------------------------------------------|----------------------------------------------------------------------------------------------|-------------------------------------------------------------------------------------|
| BIOLOGISTIC MYB PAM1 | CCCTCCAACAACACCGCCATTCTATAAATCTAGCTAC <b>CTCTA</b> ---CACATCGGCAGCAACACGGAATCCGCCACCTGGTCCTA  | CCCTCCAACAACACCGCCATTCTATAAATCTAGCTACCTCTA---CACATCGGCAGCAACACGGAATCCGCCACCTGGTCCTA          | CCCTCCAACAACACCGCCATTCTATAAATCTAGCTACCTCTA---CACATCGGCAGCAACACGGAATCCGCCACCTGGTCCTA |
|                      | C1                                                                                            | CCCTCCAACAACACCGCCATTCTATAAATCTAGCTACCTCTA---ACGGAATCCGCCACCTGGTCCTA                         | -21bp (2/6)                                                                         |
|                      |                                                                                               | CCCTCCAACAACACCGCCATTCTATAAATCTAGCTACCTCTA---TCGGCAGCAACACGGAATCCGCCACCTGGTCCTA              | -4bp (2/6)                                                                          |
|                      |                                                                                               | CCCTCCAACAACACCGCCATTCTATAAATCTAGCTACCTCTA---AATCCGCCACCTGGTCCTA                             | -25bp (1/6)                                                                         |
|                      |                                                                                               | CCCTCCAACAACACCGCCATTCTATAAATCTAGCTACCTCTA---CACATCGGCAGCAACACGGAATCCGCCACCTGGTCCTA          | WT (1/8)                                                                            |
|                      |                                                                                               | CCCTCCAACAACACCGCCATTCTATAAATCTAGCTACCTCTA---ACGGAATCCGCCACCTGGTCCTA                         | -537bp (1/8)                                                                        |
|                      | C3                                                                                            | CCCTCCAACAACACCGCCATTCTATAAATCTAGCTACCTCTA---CACATCGGCAGCAACACGGAATCCGCCACCTGGTCCTA          | +2bp, -504bp (2/8)                                                                  |
|                      |                                                                                               | CCCTCCAACAACACCGCCATTCTATAAATCTAGCTACCTCTA---TCGGCAGCAACACGGAATCCGCCACCTGGTCCTA              | -5bp (2/8)                                                                          |
|                      |                                                                                               | CCCTCCAACAACACCGCCATTCTATAAATCTAGCTACCTCTA <b>TC</b> -CACATCGGCAGCAACACGGAATCCGCCACCTGGTCCTA | +2bp (2/8)                                                                          |
|                      |                                                                                               | CCCTCCAACAACACCGCCATTCTATAAATCTAGCTACCTCTA---CACATCGGCAGCAACACGGAATCCGCCACCTGGTCCTA          | WT (1/7)                                                                            |
|                      | CCCTCCAACAACACCGCCATTCTATAAATCTAGCTACCTCTA---CATCGGCAGCAACACGGAATCCGCCACCTGGTCCTA             | -2bp (4/7)                                                                                   |                                                                                     |
| C4                   | CCCTCCAACAACACCGCCATTCTATAAATCTAGCTACCTCTA---ACATCGGCAGCAACACGGAATCCGCCACCTGGTCCTA            | -7bp (2/7)                                                                                   |                                                                                     |
|                      | CCCTCCAACAACACCGCCATTCTATAAATCTAGCTACCTCTA---CACATCGGCAGCAACACGGAATCCGCCACCTGGTCCTA           | WT (2/7)                                                                                     |                                                                                     |
|                      | CCCTCCAACAACACCGCCATTCTATAAATCTAGCTACCTCTA---CACATCGGCAGCAACACGGAATCCGCCACCTGGTCCTA           | C>T (1/7)                                                                                    |                                                                                     |
| C5                   | CCCTCCAACAACACCGCCATTCTATAAATCTAGCTACCTCTA <b>AA</b> -CACATCGGCAGCAACACGGAATCCGCCACCTGGTCCTA  | +1bp (2/7)                                                                                   |                                                                                     |
|                      | CCCTCCAACAACACCGCCATTCTATAAATCTAGCTACCTCTA---TCGGCAGCAACACGGAATCCGCCACCTGGTCCTA               | -4bp (2/7)                                                                                   |                                                                                     |
|                      | CCCTCCAACAACACCGCCATTCTATAAATCTAGCTACCTCTA---CACATCGGCAGCAACACGGAATCCGCCACCTGGTCCTA           | WT (1/7)                                                                                     |                                                                                     |
|                      | CCCTCCAACAACACCGCCATTCTATAAATCTAGCTACCTCTA---TCGGCAGCAACACGGAATCCGCCACCTGGTCCTA               | -4bp (2/7)                                                                                   |                                                                                     |
| C8                   | CCCTCCAACAACACCGCCATTCTATAAATCTAGCTACCTCTA---ACATCGGCAGCAACACGGAATCCGCCACCTGGTCCTA            | -1bp (2/7)                                                                                   |                                                                                     |
|                      | CCCTCCAACAACACCGCCATTCTATAAATCTAGCTACCTCTA---ACATCGGCAGCAACACGGAATCCGCCACCTGGTCCTA            | -3bp (2/7)                                                                                   |                                                                                     |
|                      | CCCTCCAACAACACCGCCATTCTATAAATCTAGCTACCTCTA <b>AA</b> -CACATCGGCAGCAACACGGAATCCGCCACCTGGTCCTA  | +2bp (5/7)                                                                                   |                                                                                     |
| C10                  | CCCTCCAACAACACCGCCATTCTATAAATCTAGCTACCTCTA <b>TTTTTTATCAGGGTTATTGTCTCATGAGCGGATACATAAAT</b>   | +196bp (2/7)                                                                                 |                                                                                     |
| CONJUGATION MYB PAM1 | CCCTCCAACAACACCGCCATTCTATAAATCTAGCTACCTCTA---CACATCGGCAGCAACACGGAATCCGCCACCTGGTCCTA           | WT (1/7)                                                                                     |                                                                                     |
|                      |                                                                                               | CCCTCCAACAACACCGCCATTCTATAAATCTAGCTACCTCTA---ACGGAATCCGCCACCTGGTCCTA                         | -132bp (1/7)                                                                        |
|                      |                                                                                               | CCCTCCAACAACACCGCCATTCTATAAATCTAGCTACCTCTA---TCGGCAGCAACACGGAATCCGCCACCTGGTCCTA              | -4bp (1/7)                                                                          |
|                      | C5                                                                                            | CCCTCCAACAACACCGCCATTCTATAAATCTAGCTACCTCTA---CATCGGCAGCAACACGGAATCCGCCACCTGGTCCTA            | -2bp (1/7)                                                                          |
|                      |                                                                                               | CCCTCCAACAACACCGCCATTCTATAAATCTAGCTACCTCTA---GCAACCGGAATCCGCCACCTGGTCCTA                     | -17bp (1/7)                                                                         |
|                      |                                                                                               | CCCTCCAACAACACCGCCATTCTATAAATCTAGCTACCTCTA---CA---GCAACCGGAATCCGCCACCTGGTCCTA                | -8bp (1/7)                                                                          |
|                      |                                                                                               | CCCTCCAACAACACCGCCATTCTATAAATCTAGCTACCTCTA---GCAGCAACACGGAATCCGCCACCTGGTCCTA                 | -7bp (1/7)                                                                          |
|                      |                                                                                               | CCCTCCAACAACACCGCCATTCTATAAATCTAGCTACCTCTA---TCGGCAGCAACACGGAATCCGCCACCTGGTCCTA              | -11bp (2/8)                                                                         |
|                      |                                                                                               | CCCTCCAACAACACCGCCATTCTATAAATCTAGCTACCTCTA---GCAACCGGAATCCGCCACCTGGTCCTA                     | -17bp (1/8)                                                                         |
|                      |                                                                                               | CCCTCCAACAACACCGCCATTCTATAAATCTAGCTACCTCTA <b>TTT</b> CACATCGGCAGCAACACGGAATCCGCCACCTGGTCCTA | +3bp (1/8)                                                                          |
| C7                   | CCCTCCAACAACACCGCCATTCTATAAATCTAGCTACCTCTA---CGGAATCCGCCACCTGGTCCTA                           | -23bp (1/8)                                                                                  |                                                                                     |
|                      | CCCTCCAACAACACCGCCATTCTATAAATCTAGCTACCTCTA <b>AGGG</b> CACATCGGCAGCAACACGGAATCCGCCACCTGGTCCTA | +3bp (1/8)                                                                                   |                                                                                     |
|                      | CCCTCCAACAACACCGCCATTCTATAAATCTAGCTACCTCTA <b>AGG</b> -CACATCGGCAGCAACACGGAATCCGCCACCTGGTCCTA | +2bp (1/8)                                                                                   |                                                                                     |
|                      | CCCTCCAACAACACCGCCATTCTATAAATCTAGCTACCTCTA---ACATCGGCAGCAACACGGAATCCGCCACCTGGTCCTA            | -7bp (1/8)                                                                                   |                                                                                     |
|                      | CCCTCCAACAACACCGCCATTCTATAAATCTAGCTACCTCTA---CACATCGGCAGCAACACGGAATCCGCCACCTGGTCCTA           | WT (2/8)                                                                                     |                                                                                     |
|                      | CCCTCCAACAACACCGCCATTCTATAAATCTAGCTACCTCTA---TA---CACGTCGGCAGCAACACGGAATCCGCCACCTGGTCCTA      | -264bp (1/8)                                                                                 |                                                                                     |
| C8                   | CCCTCCAACAACACCGCCATTCTATAAATCTAGCTACCTCTA---TCGGCAGCAACACGGAATCCGCCACCTGGTCCTA               | -4bp (2/8)                                                                                   |                                                                                     |
|                      | CCCTCCAACAACACCGCCATTCTATAAATCTAGCTACCTCTA---CATCGGCAGCAACACGGAATCCGCCACCTGGTCCTA             | -2bp (2/8)                                                                                   |                                                                                     |
|                      | CCCTCCAACAACACCGCCATTCTATAAATCTAGCTACCTCTA---ACATCGGCAGCAACACGGAATCCGCCACCTGGTCCTA            | -1bp (1/8)                                                                                   |                                                                                     |
|                      | CCCTCCAACAACACCGCCATTCTATAAATCTAGCTACCTCTA---CACATCGGCAGCAACACGGAATCCGCCACCTGGTCCTA           | WT (1/7)                                                                                     |                                                                                     |
|                      | CCCTCCAACAACACCGCCATTCTATAAATCTAGCTACCTCTA <b>GTACTGGA</b> -----GCCACCTGGTCCTA                | +8bp, -369bp (2/7)                                                                           |                                                                                     |
| C10                  | CCCTCCAACAACACCGCCATTCTATAAATCTAGCTACCTCTA <b>AA</b> -CACATCGGCAGCAACACGGAATCCGCCACCTGGTCCTA  | -29bp (1/7)                                                                                  |                                                                                     |
|                      | CCCTCCAACAACACCGCCATTCTATAAATCTAGCTACCTCTA---GGCAGCAACACGGAATCCGCCACCTGGTCCTA                 | +1bp (1/7)                                                                                   |                                                                                     |
|                      | CCCTCCAACAACACCGCCATTCTATAAATCTAGCTACCTCTA---TCGGCAGCAACACGGAATCCGCCACCTGGTCCTA               | -6bp (1/7)                                                                                   |                                                                                     |
|                      | CCCTCCAACAACACCGCCATTCTATAAATCTAGCTACCTCTA---TCGGCAGCAACACGGAATCCGCCACCTGGTCCTA               | -11bp (1/7)                                                                                  |                                                                                     |
| BIOLOGISTIC MYB PAM2 | WT                                                                                            | CAGAAAAAGAGAAAAATTCCTCGTGGGGACGTCATGAGTTATC---TCATGGGCCTTTTTTCTCGTTGCGGCAACAACCTGA           | WT (1/7)                                                                            |
|                      |                                                                                               | CAGAAAAAGAGAAAAATTCCTCGTGGGGACGTCATGAGTTATC---TCATGGGCCTTTTTTCTCGTTGCGGCAACAACCTGA           | +1bp, -9bp (1/7)                                                                    |
|                      | C2                                                                                            | CAGAAAAAGAGAAAAATTCCTCGTGGGGACGTCATGAGTTATC---TCATGGGCCTTTTTTCTCGTTGCGGCAACAACCTGA           | -1bp (2/7)                                                                          |
|                      |                                                                                               | CAGAAAAAGAGAAAAATTCCTCGTGGGGACGTCATGAGTTATC---ATGGGCCTTTTTTCTCGTTGCGGCAACAACCTGA             | -2bp (3/7)                                                                          |
|                      |                                                                                               | CAGAAAAAGAGAAAAATTCCTCGTGGGGACGTCATGAGTTATC---TCATGGGCCTTTTTTCTCGTTGCGGCAACAACCTGA           | WT (2/8)                                                                            |
|                      |                                                                                               | CAGAAAAAGAGAAAAATTCCTCGTGGGGACGTCATGAGTTATC---ATGAGGCCTTTTTTCTCGTTGCGGCAACAACCTGA            | +2bp (2/8)                                                                          |
|                      | C4                                                                                            | CAGAAAAAGAGAAAAATTCCTCGTGGGGACGTCATGAGTTATC <b>CT</b> CATGGGCCTTTTTTCTCGTTGCGGCAACAACCTGA    | +2bp (2/8)                                                                          |
|                      |                                                                                               | CAGAAAAAGAGAAAAATTCCTCGTGGGGACGTCATGAGTTATC---CTATGGGCCTTTTTTCTCGTTGCGGCAACAACCTGA           | +1bp (1/8)                                                                          |
|                      |                                                                                               | CAGAAAAAGAGAAAAATTCCTCGTGGGGACGTCATGAGTTATC---TTTCATGGGCCTTTTTTCTCGTTGCGGCAACAACCTGA         | +2bp, -1bp (1/8)                                                                    |
|                      |                                                                                               | CAGAAAAAGAGAAAAATTCCTCGTGGGGACGTCATGAGTTATC---CTATGGGCCTTTTTTCTCGTTGCGGCAACAACCTGA           | -1bp (2/8)                                                                          |
| C9                   | CAGAAAAAGAGAAAAATTCCTCGTGGGGACGTCATGAGTTATC---GGCCTTTTTTCTCGTTGCGGCAACAACCTGA                 | -14bp (3/8)                                                                                  |                                                                                     |
|                      | CAGAAAAAGAGAAAAATTCCTCGTGGGGACGTCATGAGTTATC---TTTTTTTCTCGTTGCGGCAACAACCTGA                    | -17bp (3/8)                                                                                  |                                                                                     |
|                      | CAGAAAAAGAGAAAAATTCCTCGTGGGGACGTCATGAGTTATC---TCATGGGCCTTTTTTCTCGTTGCGGCAACAACCTGA            | WT (1/8)                                                                                     |                                                                                     |
|                      | CAGAAAAAGAGAAAAATTCCTCGTGGGGACGTCATGAGTTATC---ATGGGCCTTTTTTCTCGTTGCGGCAACAACCTGA              | -2bp (4/8)                                                                                   |                                                                                     |
| C10                  | CAGAAAAAGAGAAAAATTCCTCGTGGGGACGTCATGAGTTATC---CATGGGCCTTTTTTCTCGTTGCGGCAACAACCTGA             | -5bp (2/8)                                                                                   |                                                                                     |
|                      | CAGAAAAAGAGAAAAATTCCTCGTGGGGACGTCATGAGTTATC---GCTTTTTTCTCGTTGCGGCAACAACCTGA                   | -13bp (1/8)                                                                                  |                                                                                     |
| CONJUGATION MYB PAM2 | WT                                                                                            | CAGAAAAAGAGAAAAATTCCTCGTGGGGACGTCATGAGTTATC---TCATGGGCCTTTTTTCTCGTTGCGGCAACAACCTGA           | WT (2/6)                                                                            |
|                      |                                                                                               | CAGAAAAAGAGAAAAATTCCTCGTGGGGACGTCATGAGTTATC---ATGGGCCTTTTTTCTCGTTGCGGCAACAACCTGA             | -2bp (1/6)                                                                          |
|                      | C2                                                                                            | CAGAAAAAGAGAAAAATTCCTCGTGGGGACGTCATGAGTTATC---CTTTTTTCTCGTTGCGGCAACAACCTGA                   | -12bp (1/6)                                                                         |
|                      |                                                                                               | CAGAAAAAGAGAAAAATTCCTCGTGGGGACGTCATGAGTTATC <b>GT</b> CATGGGCCTTTTTTCTCGTTGCGGCAACAACCTGA    | +1bp (2/6)                                                                          |
|                      |                                                                                               | CAGAAAAAGAGAAAAATTCCTCGTGGGGACGTCATGAGTTATC---TCATGGGCCTTTTTTCTCGTTGCGGCAACAACCTGA           | WT (1/7)                                                                            |
|                      |                                                                                               | CAGAAAAAGAGAAAAATTCCTCGTGGGGACGTCATGAGTTATC <b>GT</b> CATGGGCCTTTTTTCTCGTTGCGGCAACAACCTGA    | +1bp (5/7)                                                                          |
|                      | C5                                                                                            | CAGAAAAAGAGAAAAATTCCTCGTGGGGACGTCATGAGTTATC---TTTTTTTCTCGTTGCGGCAACAACCTGA                   | -12bp (1/7)                                                                         |
|                      |                                                                                               | CAGAAAAAGAGAAAAATTCCTCGTGGGGACGTCATGAGTTATC---TCATGGGCCTTTTTTCTCGTTGCGGCAACAACCTGA           | WT (2/7)                                                                            |
|                      |                                                                                               | CAGAAAAAGAGAAAAATTCCTCGTGGGGACGTCATGAGTTATC---ATGGGCCTTTTTTCTCGTTGCGGCAACAACCTGA             | -2bp (2/7)                                                                          |
|                      | C10                                                                                           | CAGAAAAAGAGAAAAATTCCTCGTGGGGACGTCATGAGTTATC---CCTTTTTTCTCGTTGCGGCAACAACCTGA                  | -14bp (2/7)                                                                         |
|                      | CAGAAAAAGAGAAAAATTCCTCGTGGGGACGTCATGAGTTATC <b>CT</b> CATGGGCCTTTTTTCTCGTTGCGGCAACAACCTGA     | +1bp (1/7)                                                                                   |                                                                                     |

50

51 **Supplementary Figure 3**

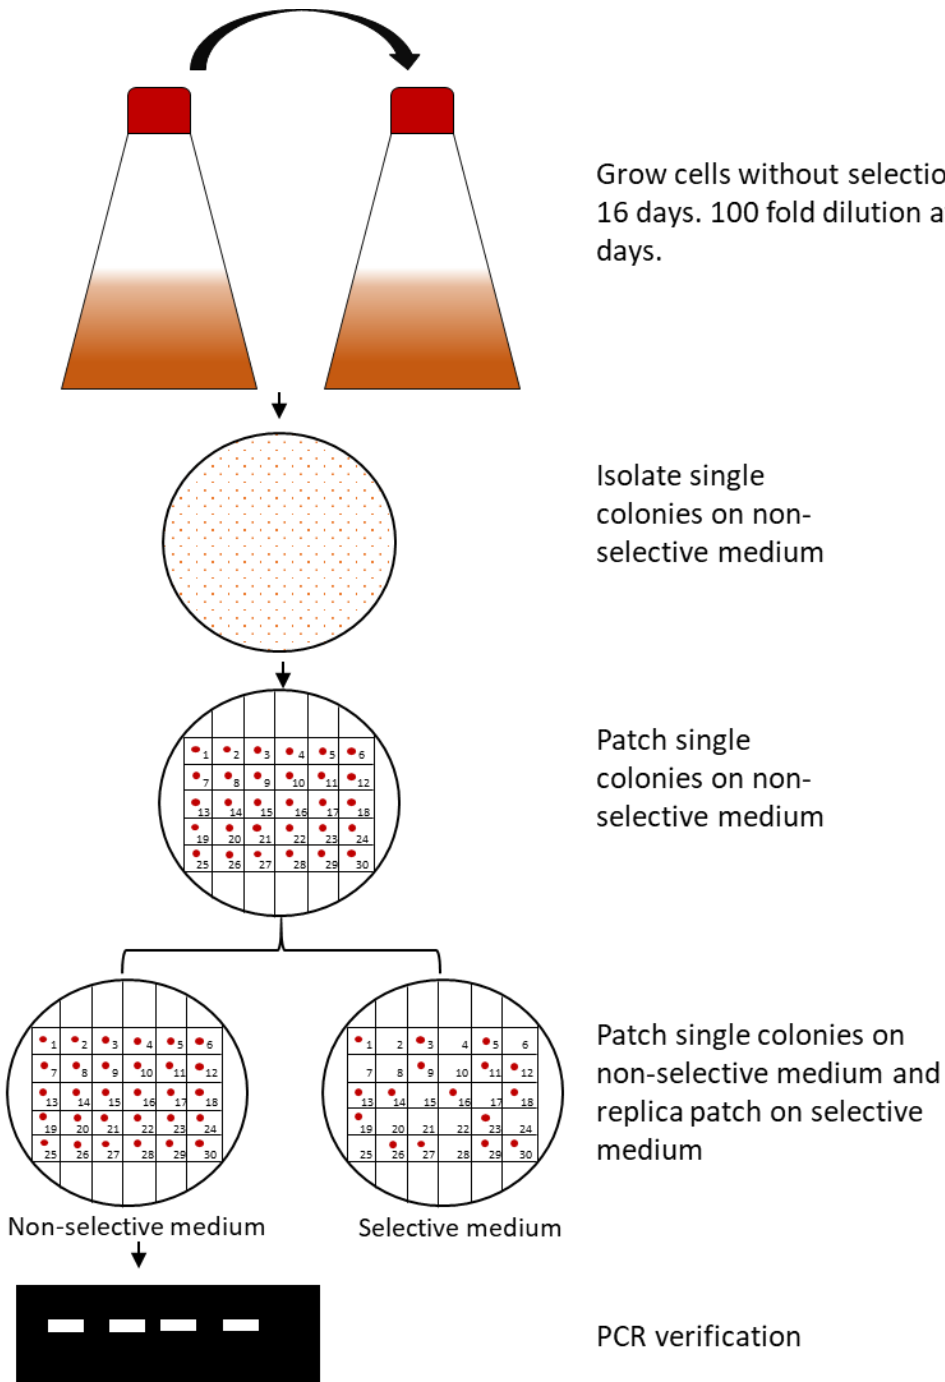

52

53

54

55

56

57

58 **Supplementary Figure 4**

59 TCGCGCGTTTTCCGGTGATGACGGTGAAAACCTCTGACACATGCAGCTCCCGGAGACGGTCACAGCTTGTCT  
60 GTAAGCGGATGCCGGGAGCAGACAAGCCCGTCAGGGCGCGTCAGCGGGTGTGGCGGGTGTGCGGGGCTGG  
61 CTTAACTATGCGGCATCAGAGCAGATTGTACTGAGAGTGCACCAGATCGTCTTGCCTTGCTCGTGGTGA  
62 TGTACTTACAGCTCGAAGTGCCTCTTCTTGATGGAGCGCATGGGGACGTGCTTGGCAATCACGCGCACCC  
63 CCCGGCCGTTTTAGCGGCTAAAAAAGTCATGGCTCTGCCCTCGGGCGGACCACGCCCATCATGACCTTGC  
64 CAAGCTCGTCTGCTTCTCTTCGATCTTCGCCAGCAGGGCGAGGATCGTGGCATCACCGAACC GCGCCGT  
65 GCGCGGGTGTGCGGTGAGCCAGAGTTT CAGCAGGCCGCCAGGGCGGCCAGGTGCGCCATTGATGCGGGCC  
66 AGCTCGCGGACGTGCTCATAGTCCACGACGCCCGTGATTTTGTAGCCCTGGCCGACGGCCAGCAGGTAGG  
67 CCGACAGGCTCATGCCGGCCGCCGCCCTTTTCTCAATCGCTCTTCGTTTCGTTCTGGAAGGCAGTACAC  
68 CTTGATAGGTGGGCTGCCCTTCCCTGGTTGGCTTGGTTTCATCAGCCATCCGCTTGCCCTCATCTGTTACG  
69 CCGGCGGTAG**CCGGCCAGCCTCGCAGAGCAGGATTCCCGTTGAGCACCGCCAGGTGCGAATAAGGGACAG**  
70 **TGAAGAAGGAACACCCGCTCGCGGGTGGGCCTACTTCACCTATCCTGCCCGGCTGACGCCGTTGGATACA**  
71 CCAAGGAAAGTCTACACGAACCCTTGGCAAAATCCTGTATATCGTGCGAAAAAGGATGGATATACCGAA  
72 AAAATCGCTATAATGACCCCGAAGCAGGGTTATGCAGCGGAAGATGGCCATTGCGCATT CAGGCTGCGCA  
73 ACTGTTGGGAAGGGCGATCGGTGCGGGCCTCTTCGCTATTACGCCAGCTGGCGAAAGGGGGATGTGCTGC  
74 AAGGCGATTAAGTTGGGTAACGCCAGGGTTTTCCAGTCACGACGTTGTAAAACGACGGCCAGTGACCAT  
75 GATTACGCCAAGCTCGAAATTAACCCTCACTAAAGGGAACAAAAGCTGGTACCTAACAGGATTAGTGCAA  
76 TTCGAGTTGAATCACTGGGAAAAACATTGTCTTCTTTTTTATATTATCATTTCGATTAGTGTGCAGTCG  
77 TAGATACTTGTGGTTGAAAGACATCAGCTGGGAGGGACTGGACTAGCGTTTGGTAAGGAGACATACTG  
78 TTAACGTTGGTTGCAAAATTCATTTCCGATTTATGTTATCTGTAAATCCTGATTTGTCTGGAATTCTT  
79 GATACTTCCGTTTTTTTTAGAGGCCAATGATTAGCATCGGCGATTCTCAAATAGCATTTTTCGACATGCGG  
80 TGCTGATTTCATAAACATAGACAACGCTTTTACATGTAAAAGTAACTTGCGGACTTGGAACAGTGCTCTG  
81 TTTTTGGTGTGAACGTAACCTCAGCAATATTTCTGTGCTAGCAAGTTTTTTTTATGATCGACCGAAGATCTC  
82 AAAACTCCGGGTCTTCAACTGTCTGACTAGACCATGTTTCGTAACGTCGGACAGCAGCTTTCGTTGTA  
83 GGTAGAATTTCTACGTGCGAAGCAGTGTAGGCAGGTTGAACGACGATCCCTGCCGATGGATGGATTGGC  
84 ACGCGGCGGAACGCTTTCGTGATCTACACCACCTGGATCTTCACATATCTTCGAAATCGAAAAATTAACC  
85 AAGTCGACGGTATCGATAATATTCTAGCTGAGGGTACCC**ATGGCCAAGTTGACCAGTGCCGTTCCGGTGC**  
86 **TCACCGCGCGGACGTCGCCGGAGCGGTGAGTTCTGGACCGACCGGCTCGGGTCTCCCGGGACTTCGT**  
87 **GGAGGACGACTTCGCCGGTGTGGTCCGGGACGACGTGACCCTGTTCATCAGCGCGGTCCAGGACCAGGTG**  
88 **GTGCCGGACAACACCCTGGCCTGGGTGTGGGTGCGCGGCCTGGACGAGCTGTACGCCGAGTGGTCCGAGG**  
89 **TCGTGTCCACGAACTTCGGGGACGCCCTCCGGGCCGGCCATGACCCGAGATCGGCGAGCAGCCGTGGGGGCG**  
90 **GGAGTTCGCCCTGCGCGACCCGGCCGGCAACTGCGTGCCTTCGTGGCCGAGGAGCAGGACTGA**CCGACG  
91 CCGACCAACACCGCCGGTCCGACGCGGCCCGACGGTCCGAGGCTCGGAGATCTGGGCCCATGCGGCCG  
92 CAACAACCTACCTCGACTTTGGCTGGGACACTTTCAGTGAGGACAAGAAGCTTCAGAAGCGTGCTATCGAA  
93 CTCAACCAGGGACGTGCGGCACAAATGGGCATCCTTGTCTCATGGTGCACGAACAGTTGGGAGTCTCTA  
94 TCCTTCCTTAAAAATTTAATTTTCATTAGTTGCAGTCACTCCGCTTTGGTTTCACAGTCAGGAATAACAC  
95 TAGCTCGTCTTCAGCGAGC**ATCACGTGCTATAAAAAATAATTATAATTTAAATTTTTTAATATAAATATAT**  
96 **AAATTAATAATAGAAAGTAAAAAAGAAATTAAGAAAAAATAGTTTTTGTTCGGAAGATGTAAAAGA**  
97 **CTCTAGGGGGATCGCCAACAATACTACCTTTTACCTTGCTCTTCTGCTCTCAGGTATTAATGCCGAAT**  
98 **TGTTTCATCTTGTCTGTGTAGAAGACCACACGAAAATCCTGTGATTTTACATTTTACTTATCGTTAAT**  
99 **CGAATGTATATCTATTTAATCTGCTTTTCTTGTCTAATAAATATATATGTAAAGTACGCTTTTTTGTGAA**  
100 **ATTTTTTAAACCTTTGTTTATTTTTTTTTCTTCATTCCGTAACCTTCTACCTTCTTTATTTACTTTCTA**  
101 **AAATCCAAATACAAAACATAAAAAATAAATAAACACAGAGTAAATTCCAAATTTATCCATCATTAAAAGA**  
102 **TACGAGGCGCGTGTAAAGTTACAGGCAAGCGATC**CTAGTACACTCTATATTTTTTTTATGCCTCGGTAATGA  
103 TTTTCATTTTTTTTTTCCACCTAGCGGATGACTCTTTTTTTTTTCTTAGCGATTGGCATTATCACATAATG  
104 AATTATACATTATATAAAGTAATGTGATTTCTTCGAAGAATATACTAAAAAATGAGCAGGCAAGATAAAC  
105 GAAGGCAAAGATGACAGAGCAGAAAGCCCTAGTAAAGCGTATTACAAATGAAACCAAGATTCAGATTGCG

106 ATCTCTTTAAAGGGTGGTCCCCTAGCGATAGAGCACTCGATCTTCCCAGAAAAAGAGGCAGAAGCAGTAG  
107 CAGAACAGGCCACACAATCGCAAGTGATTAACGTCCACACAGGTATAGGGTTTCTGGACCATATGATACA  
108 TGCTCTGGCCAAGCATTCCGGCTGGTCGCTAATCGTTGAGTGCATTGGTGACTTACACATAGACGACCAT  
109 CACACCACTGAAGACTGCGGGATTGCTCTCGGTCAAGCTTTTAAAGAGGGCCCTAGGGGCCGTGCGTGGAG  
110 TAAAAAGGTTTGGATCAGGATTTGCGCCTTTGGATGAGGCACTTCCAGAGCGGTGGTAGATCTTTCGAA  
111 CAGGCCGTACGCAGTTGTCGAACTTGGTTTGCAAAGGAGAAAGTAGGAGATCTCTCTTGCAGAGATGATC  
112 CCGCATTTTCTTGAAAGCTTTGCAGAGGGCTAGCAGAATTACCCTCCACGTTGATTGTCTGCGAGGCAAGA  
113 ATGATCATCACCGTAGTGAGAGTGC GTTCAAGGCTCTTGCGGTTGCCATAAGAGAAGCCACCTCGCCAA  
114 TGGTACCAACGATGTTCCCTCCACCAAAGGTGTTCTTATGTAGTTTTACACAGGAGTCTGGACTTGACCT  
115 GAGCT**CAATCTCGCCTATTTCATGGTGTATAAAAGTTCAACATCCAAAGCTAGAACTTTTGGAAAGAGAAA**  
116 **GAATATCCGAATAGGGCACGGCGTGCCGTATTGTTGGAGTGGACTAGCAGAAAGTGAGGAAGGCACAGGA**  
117 **TGAGTTTTCTCGAGACACATAGCTTCAGCGTCGTGTAGGCTAGGCAGAGGTGAGTTTTCTCGAGACATAC**  
118 **CTTCAGCGTCGTCTTCACTGTCACAGTCAACTGACAGTAATCGTTGATCCGGAGAGATTCAAAATTCAAT**  
119 **CTGTTTGGACCTGGATAAGACACAAGAGCGACATCCTGACATGAACGCCGTAAACAGCAAATCCTGGTTG**  
120 **AACACGTATCCTTTTGGGGCCCTCCGCTACGACGCTCGCTCCAGCTGGGGCTTCTTACTATACACAGCG**  
121 **CGCATATTTACGGTTGCCAGAAGTCAAGATGGCCTCTAGAATGGACTATAAGGACCACGACGGAGATTA**  
122 **CAAGGATCATGATATTGATTACAAAGACGATGATGATAAAATGGCCCAAAGAAGAAGCGGAAAGTCGGT**  
123 **ATACACGGAGTCCCAGCAGCCGACAAGAAGTACTCGATTGGATTGGACATCGGCACCAACTCTGTTGGAT**  
124 **GGGCCGTATCACGGACGAGTACAAGGTGCCAGCAAGAAATTCAAAGTACTGGGAAACACTGACCGCCA**  
125 **TTCGATCAAGAAGAATTTGATTGGAGCTTTGCTGTTTGACAGCGCGAAACAGCGGAAGCCACGCGGCTT**  
126 **AAACGAACCGCGAGACGAAGATATACGCGACGGAAGAACC GTATCTGCTATCTACAAGAGATTTTCTCGA**  
127 **ATGAGATGGCAAAAGTCGATGACTCTTTCTTTACCGATTGGAAGAATCCTTCTCGTTGAAGAGGATAA**  
128 **GAAACATGAGCGGCACCCGATATTTGGAACATTGTGGACGAGGTGGCTTACCATGAGAAATACCCGACT**  
129 **ATTTACCACCTGCGAAAGAAATTTGGTGGACTCGACGGACAAAGCGGATCTTCGCCTAATCTATTTGGCGC**  
130 **TAGCACATATGATTAAGTTTTCGCGCCACTTCTTGATCGAAGGCGACTTGAATCCGACAACAGTGATGT**  
131 **TGACAAACTGTTTATTTCAACTTGTACAACTTACAACCAGCTCTTTGAAGAAAATCCATTAACGTTTCG**  
132 **GGAGTGGACGCGAAAAGCCATCCTTTCTGCCGACTCAGCAAGAGCCGACGCCTAGAAAATTTGATTGCGC**  
133 **AACTTCCCGGCGAGAAAAAGAATGGACTTTTTTGGAAATCTTATTGCTTTGTGCGCTGGGCCTTACGCCGAA**  
134 **CTTTAAGAGCAACTTCGACCTTGCGGAAGATGCCAAATTGCAACTGAGTAAAGACACATATGACGACGAC**  
135 **CTCGACAATCTTTTGGCACAATAGGAGATCAGTACGCCGACCTCTTTTTGGCGGCTAAGA ACTTGTCCG**  
136 **ACGCCATTCTGTTGTGCGACATCCTTCGAGTTAATACGGAGATTACTAAGGCGCCCTTGAGCGCCTCTAT**  
137 **GATCAAAAGATACGACGAGCATACCAAGACCTGACCCTCCTTAAAGCTCTCGTCCGGCAACAGCTGCCT**  
138 **GAGAAGTACAAAGAGATTTTTCTTTGATCAAAGCAAAAACGGATACGCGGGCTACATTGACGGGGGAGCCT**  
139 **CGCAAGAAGAGTTCTACAAGTTTATTAACCGATCCTGGAAAAGATGGACGGCAGGAGGAATTACTCGT**  
140 **GAAACTTAACCGAGAGGACCTTTTGC GTAAGCAACGGACTTTCGACAACGGATCTATTCCGCACCAAATC**  
141 **CATCTCGGAGAATTGCACGCAATTCTGCGCCGGCAAGAAGATTTTTATCCATTTCTCAAGGACAACCGGG**  
142 **AAAAGATTGAGAAAATCTTAACCTTCGCATACCTACTACGTCCGCCCTTTGGCCAGGGGAAAATTCGAG**  
143 **ATTTGCCTGGATGACGCGAAAGAGTGAGGAACTATTACTCCCTGGAATTTCGAAGAAGTGGTAGACAAA**  
144 **GGAGCTTCCGCGCAATCCTTTATCGAGCGCATGACCAACTTCGATAAGAACCTCCCGAATGAGAAAAGTCC**  
145 **TACCCAAGCATTTCGTTGCTCTACGAATACTTTACGGTGTATAATGAGCTGACTAAAGTCAAATACGTTAC**  
146 **AGAGGGAATGCGAAAACCGGCTTTCTCTCGGGAGAGCAGAAAAAGGCCATAGTCGATCTTCTCTTTAAA**  
147 **ACGAACCGTAAAGTTACCGTGAAACAATAAAAGAGGACTACTTCAAGAAAATCGAATGCTTTGACTCCG**  
148 **TTGAAATTTCCGGCGTTGAAGATCGGTTCAATGCCCTCTTGGGAACATACCACGATCTCCTGAAAATTAT**  
149 **CAAAGACAAGGACTTCTTGACAATGAGGAAAACGAGGACATTCTTGAAGATATTGTCTTGACGCTAACA**  
150 **CTTTTGGAGATCGAGAGATGATTGAGGAACGCCTTAAACCTATGCGCATCTGTTCGACGACAAAAGTTA**  
151 **TGAAGCAATTGAAGCGCCGGAGATATACGGGATGGGGAAGGTTGAGTCGGAAACTGATAAATGGCATACG**  
152 **CGATAAGCAGTCCGGCAAACAATCTCGATTTCTTGAAGTCCGACGGATTTGCGAATCGAACTTCATG**  
153 **CAACTGATCCATGACGATTGCTTGACCTTTAAAGAGGACATTCAAAAGCCCAAGTATCCGGACAAGGAG**  
154 **ATTCTTTGCACGAGCATATTGCGAATCTTGCTGGAAGTCCGGCTATTA AAAAGGGCATTCTCCAGACAGT**



155 AAAGGTCGTGGATGAACTCGTTAAAGTTATGGGCCGACACAAACCCGAGAACATAGTCATCGAAATGGCG  
156 AGAGAGAACCAGACCACCCAAAAGGGACAGAAAAATTCACGCGAGCGAATGAAGCGGATTGAAGAGGGGA  
157 TCAAAGAGCTTGGCAGCCAAATTCTGAAAGAACACCCGGTTGAAAACACCCAATTGCAGAACGAGAAGCT  
158 CTACCTGTACTATCTTCAAATGGGCGTGATATGTACGTGATCAAGAATTGGACATCAACCCGGCTATCC  
159 GATTACGATGTGGACCATATTGTTCCCTCAGTCGTTTCTCAAAGACGACTCCATAGACAATAAGGTTCTAA  
160 CGAGAAGCGACAAGAACC GCGGCAATCAGACAACGTCCCCTCCGAGGAAGTAGTTAAGAAAATGAAGAA  
161 TTACTGGCGCAATTGCTGAACGCTAAGCTCATTACCCAAAGAAAAGTTTGACAATTTGACGAAAAGCCGAG  
162 CGAGGCCGGGCTCTCGGAACTGGATAAGGCCGGCTTCATTAAAAGACAATTGGTGAAACGCGACAAATCA  
163 CAAAGCACGTGCGCACAGATTCTCGACTCCCGCATGAACACTAAGTATGACGAGAATGACAAACTAATCCG  
164 GGAAGTCAAAGTGATTACCTTGAAGTCCAAGCTGGTTTCCGATTTTCGTAAGATTTTCAGTTTTACAAA  
165 GTTCGCGAGATCAACAAC TACCATCAGCGCACGACGCTTACTTGAACGCTGTCGTGGGAACGGCCTTGA  
166 TTA AAAAATACCC TAAAGCTGGAAAGCGAGTTCGTTTACGGCGATTACAAGGTGTATGACGTACGCAAAAT  
167 GATCGCGAAGTCAGAGCAGGAAATGGCAAAGCTACTGCGAAGTACTTCTTTTATAGCAACATAATGAAT  
168 TTTTTCAAACG GAGATTACCTCGCTAACGGCGAGATTGCGAAGCGCCCTCTTATCGAGACAAACGGCG  
169 AAACGGGGGAGATTGTCTGGGATAAAGGCCGCGATTTTGC GACTGTGCGGAAAGTCTTGTGATGCCGCA  
170 AGTGAATATAGTCAAAAAGACGGAGGTGCAAACAGGCCGCTTTTCGAAAGAATCTATCCTTCCCAAAGG  
171 AACTCTGATAAGTTGATTGCGCGAAAAAAGGATTGGGACCCTAAGAAGTATGGCGGCTTTGACAGCCCGA  
172 CCGTAGCATATTCTGTCTTGTGGTGGCCAAAGTCGAAAAGGGCAAATCCAAGAACTGAAGAGTGTGAA  
173 AGAATTGCTTGGGATTACGATCATGGAAAGATCATCTTTTGAGAAGAATCCCATCGACTTTCTCGAAGCT  
174 AAAGGCTACAAAGAAGTGAAAAGGACCTGATTATCAAGTTGCCTAAGTACTCCTTGTTTGAGCTGGAAA  
175 ATGGCCGTAAGCGAATGCTCGCTTCTGCCGGCGAACTCCAGAAGGGAAACGAATTGGCGCTGCCCTCCAA  
176 ATATGTTAACTTTCTTTACCTTGCCTCGCACTATGAGAAGCTCAAGGGCTCCCCGAGGATAATGAGCAA  
177 AAACAAC TGTGTG TAGAACAGCATAAGCACTACTTGGACGAGATCATTGAGCAAAATAGCGAGTTCTCCA  
178 AGCGAGTCATCCTTGCCGACGCTAATCTGGACAAAGTCCTGTCCGCCTACAATAAGCACCCGCGATAAGCC  
179 AATCCGAGAGCAAGCGGAGAATATTATCCACTTGTTTACGCTACCAATCTTGGAGCCCTGCCGCCTTT  
180 AAGTACTTTGACACCACCATCGACCGCAAGAGGTACACCAGCACCAAGAAGTCTTGGACGCCACCCTCA  
181 TTCACCAATCAATCACC GGCTTGTACGAGACACGCATCGACCTGTCTCAACTCGGAGGCGACAAAAGGCC  
182 GGCGGCCACGAAAAAGGCCGGCCAGGCAAAAAAGAAAAGTAATCTGGATCCCTACCTCGACTTTGGCTG  
183 GGACACTTTTCAGTGAGGACAAGAAGCTCCAGAAGCGTGCTATCGAACTCAACCAGGGACGTGCGGCACAA  
184 ATGGGCATCCTTGCTCTCATGGTGCACGAACAGTTGGGAGTCTCTATCCTTCCCTAAAATTTAATTTTC  
185 ATTAGTTGCAGTCACTCCGCTTTGGTTTTACAGTCAGGAATAACACTAGCTCGTCTTCACTGCAGGTTGG  
186 CTCGGAAGTTGGTGTGACGGT GAGCTGGA AATTGGTTGTGCGTCACTGCTAGCGAGAAGAAAACGGAGG  
187 ACAGAAGGAAGTGAACTCGGTTTCGTTCTCGACAGCCTCACTGTCAATATGCTCATTTTCAATCCTTAGC  
188 GCTTTTAAATGTGCAATTGACGGTAAATTGAATAGGATCTATAATATCTACAAGGTACTTTGACAGCCAA  
189 GTATTCATTGTTAGTCAACAATATTTTAGAGCTTTATAAGGTCAAAAACACCTTCAAAGTCGAGGAGAC  
190 CGAGAGAGGGTCTCAGTTTTAGAGCTAGAAATAGCAAGTTAAAATAAGGCTAGTCCGTTATCAACTTGAA  
191 AAAGTGGCACCGAGTCGGTGCTTTTTTTTAGAACCGCTCACCCATGCTATCGTATGTCATTTACATTGAC  
192 AAAC TGCTATGAATGCGTTTTGCGATAACTTCAGCTCGCTGAAGCCCTAGACATTTGTTTTGACTAAATTG  
193 TTTTCCGGTTGCTTTACTACCGACCGGTCTGCGGGTAGCATGTCTTGGCTTTTTCGAGTTCGAGAGAATT  
194 TATGGACAAGTGCGTTTACAGTTTGGAACACGAGTGTGAGTGAGCGGAATTGGCTATCTATAACATTCTT  
195 ATTTTCAGGAGGCTGGTGATTAGCAGAATTTTCAAAGATCTCGAATCTAAAATCGCCATGGGCTCGACGAA  
196 CTTTTCTGCAAGCTTCATGCAAGCTTGGCGTAATCATGGTCATAGCTGTTTCCCTGTGTGAAATTGTTATC  
197 CGCTCACAATTCACACAACATAACGAGCCGGAAGCATAAAGTGTAAAGCCTGGGGTGCCTAATGAGTGAG  
198 CTAAC TACATTAATTGCGTTGCGCTCACTGCCCGCTTTCAGTCGGGAAACCTGTCGTGCCAGCTGCAT  
199 TAATGAATCGGCCAACGCGCGGGGAGAGGCGGTTTGCATATTGGGCGCTCTTCCGCTTCCCTCGCTCACTG  
200 ACTCGCTGCGCTCGGTTCGTTTCGGCTGCGGCGAGCGGTATCAGCTCACTCAAAGGCGGTAATACGGTTATC  
201 CACAGAATCAGGGGATAACG CAGGAAAGAACATGTGAGCAAAAAGGCCAGCAAAAAGGCCAGGAACCGTAA  
202 AAGGCCGCGTTGCTGGCGTTTTTCCATAGGCTCCGCCCCCTGACGAGCATCACAAAATCGACGCTCAA  
203 GTCAGAGGTGGCGAAACCCGACAGGACTATAAAGATACCAGGCGTTTCCCCCTGGAAGCTCCCTCGTGCG

204 CTCTCCTGTTCCGACCCTGCCGCTTACCGGATACCTGTCCGCCTTTCTCCCTTCGGGAAGCGTGGCGCTT  
205 TCTCATAGCTCACGCTGTAGGTATCTCAGTTCGGTGTAGGTTCGCTCCAAGCTGGGCTGTGTGCACG  
206 AACCCCCCGTTCAGCCCCGACCCTGCGCCTTATCCGGTAACTATCGTCTTGAGTCCAACCCGGTAAGACA  
207 CGACTTATCGCCACTGGCAGCAGCCACTGGTAACAGGATTAGCAGAGCGAGGTATGTAGGCGGTGCTACA  
208 GAGTTCCTGAAGTGGTGGCCTAACTACGGCTACACTAGAAGAACAGTATTTGGTATCTGCGCTCTGCTGA  
209 AGCCAGTTACCTTCGGAAAAAGAGTTGGTAGCTCTTGATCCGGCAAACAAACCACCGCTGGTAGCGGTGG  
210 TTTTTTTGTTTTGCAAGCAGCAGATTACGCGCAGAAAAAAGGATCTCAAGAAGATCCTTTGATCTTTTTCT  
211 ACGGGGTCTGACGCTCAGTGGAAACGAAAACCTCACGTTAAGGGATTTTGGTCATGAGATTATCAAAAAGGA  
212 TCTTCACCTAGATCCTTTTTAAATTA AAAATGAAGTTTTAAATCAATCTAAAGTATATATGAGTAAACTTG  
213 GTCTGACAGTTACCAATGCTTAATCAGTGAGGCACCTATCTCAGCGATCTGTCTATTTTCGTTTCATCCATA  
214 GTTGCCTGACTCCCCGTCGTGTAGATAACTACGATACGGGAGGGCTTACCATCTGGCCCCAGTGCTGCAA  
215 TGATACCGCGATACCCACGCTCACCGGCTCCAGATTTATCAGCAATAAACAGCCAGCCGGAAGGGCCGA  
216 GCGCAGAAGTGGTCTGCAACTTTATCCGCCTCCATCCAGTCTATTAATTGTTGCCGGGAAGCTAGAGTA  
217 AGTAGTTCGCCAGTTAATAGTTTGCGCAACGTTGTTGCCATTGCTACAGGCATCGTGGTGTACGCTCGT  
218 CGTTTGGTATGGCTTCATTCAGCTCCGGTTCCCAACGATCAAGGCGAGTTACATGATCCCCCATGTTGTG  
219 CAAAAAAGCGGTTAGCTCCTTCGGTCCCTCCGATCGTTGTCAGAAGTAAGTTGGCCGAGTGTTATCACTC  
220 ATGGTTATGGCAGCACTGCATAATFCTCTACTGTCATGCCATCCGTAAGATGCTTTTCTGTGACTGGTG  
221 AGTCGATTTATTCAACAAAGCCACGTTGTGTCTCAAAATCTCTGATGTTACATTGCACAAGATAAAAATA  
222 TATCATCATGAACAATAAAACTGTCTGCTTACATAAACAGTAATACAAGGGGTGTTATGAGCCATATTCA  
223 ACGGGAAACGTCTTGCTCGAGGCCGCGATTAAATTC AACATGGATGCTGATTTATATGGGTATAAATGG  
224 GCTCGCGATAATGTCCGGCAATCAGGTGCGACAATCTATCGATTGTATGGGAAGCCCGATGCGCCAGAGT  
225 TGTTTCTGAAACATGGCAAAGGTAGCGTTGCCAATGATGTTACAGATGAGATGGTCAGACTAAACTGGCT  
226 GACGGAATTTATGCCTCTTCCGACCATCAAGCATTTTATCCGTACTCCTGATGATGCATGGTTACTCACC  
227 ACTGCGATCCCCGGGAAAACAGCATTCCAGGTATTAGAAGAATATCCTGATTCAGGTGAAAATATTGTTG  
228 ATGCGCTGGCAGTGTTCTGCGCCGTTGCATTGATTCTCTGTTTGTAAATTGTCTTTTAAACAGCGATCG  
229 CGTATTTTCGTCTCGCTCAGGCGCAATCACGAATGAATAACGGTTTGGTTGATGCGAGTGATTTTGTGAC  
230 GAGCGTAATGGCTGGCCTGTTGAACAAGTCTGGAAAGAAATGCATAAGCTTTTGCATTCTCACCGGATT  
231 CAGTCGTCACTCATGGTGATTTCTCACTTGATAACCTTATTTTTGACGAGGGGAAATTAATAGGTTGTAT  
232 TGATGTTGGACGAGTCGGAATCGCAGACCGATAACCAGGATCTTGCCATCCTATGGAAGTGCCTCGGTGAG  
233 TTTTCTCCTTATTACAGAAACGGCTTTTTTCAAAAATATGGTATTGATAATCCTGATATGAATAAATTGC  
234 AGTTTCATTTGATGCTCGATGAGTTTTTCTAAATCAGAAATTGGTTAATTGGTTGTAACACTGGCACTCAAC  
235 CAAGTCATTCTGAGAATAGTGTATGCGGCGACCGAGTTGCTCTTGCCCGGCGTCAATACGGGATAATACC  
236 GCGCCACATAGCAGAACTTTAAAAGTGCTCATCATTTGAAAACGTTCTTCGGGGCGAAAACCTCTCAAGGA  
237 TCTTACCCTGTTGAGATCCAGTTCGATGTAACCCACTCGTGCACCCAAGTATCTTACAGCATCTTTTAC  
238 TTTCACCAGCGTTTCTGGGTGAGCAAAAACAGGAAGGCAAAATGCCGCAAAAAGGGAATAAGGGCGACA  
239 CGGAAATGTTGAATACTCATACTCTTCCTTTTTCAATATTATTGAAGCATTATCAGGGTTATTGTCTCA  
240 TGAGCGGATACATATTTGAATGTATTTAGAAAAATAACAAATAGGGGTTCCGCGCACATTTCCCCGAAA  
241 AGTGCCACCTGACGTCTAAGAAACCATTATTATCATGACATTAACCTATAAAAATAGGCGTATCACGAGG  
242 CCCTTTCGTC

243

244

245

246

247

248



249

250 **Supplementary Figure 5**

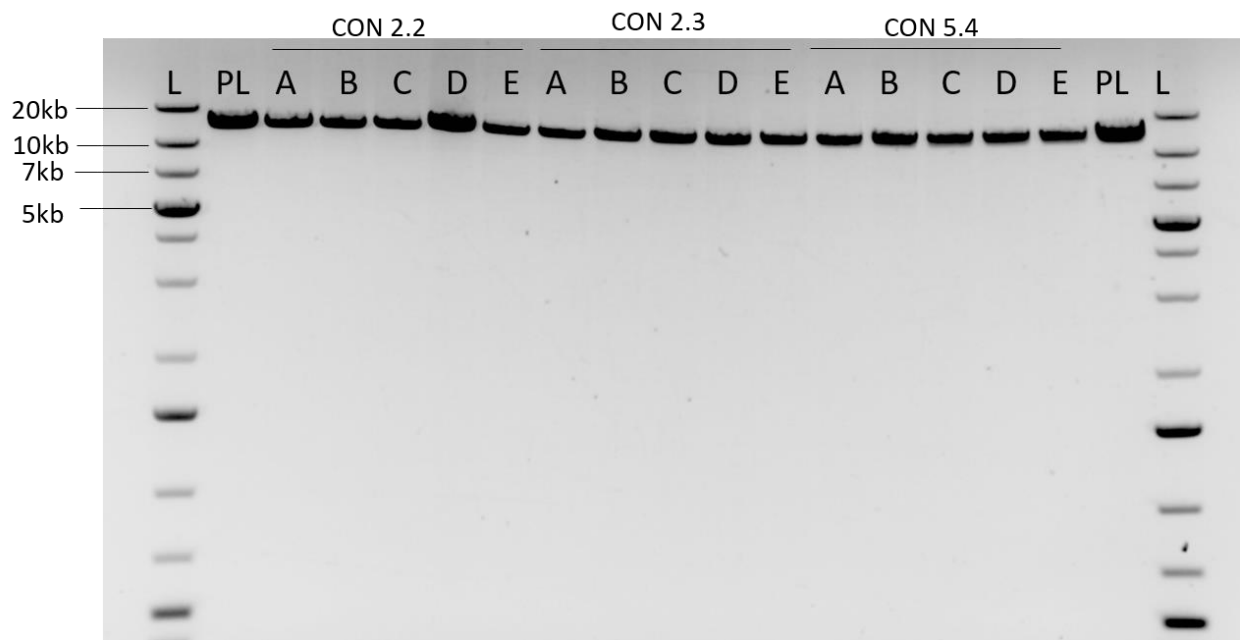

251

252

253

254

255

256

257

258

259

260

261

262

263

264

265

266

267

268

269 **Supplementary Table 1**

270

| Nucleotide Position | Allele 1 | Allele 2           |
|---------------------|----------|--------------------|
| 112                 | G        | A                  |
| 191-196             | -        | GCGGCAACA (Insert) |
| 311-312             | TT       | CC                 |
| 330                 | T        | C                  |
| 459                 | T        | G                  |
| 477                 | T        | C                  |
| 593                 | G        | C                  |
| 600                 | C        | G                  |
| 758                 | G        | C                  |
| 1095                | A        | G                  |

271

272

273

274

275

276

277

278

279

280

281

282

283

284

285

286

287

288

289

290

291 **Supplementary Table 2: List of primers used in the experiments.**

| Primer Name                                | 5' Sequence 3'                | PCR product size(bp) |
|--------------------------------------------|-------------------------------|----------------------|
| <b>Primary PCR amplification</b>           |                               |                      |
| Myb PAM 1 seq Fw                           | CCCGATGCTGCCAATCTCAGC         | 790                  |
| Myb PAM 1 seq Rw                           | GGACGGTGGCGTGCATCAAG          |                      |
| Myb PAM 2 seq Fw                           | GCCTACGATGCGACTGTCCG          | 482                  |
| Myb PAM 2 seq Rw                           | CCGACAGCGGTGGCCGTGCTC         |                      |
| <b>High resolution melting primers</b>     |                               |                      |
| HRM_Myb PAM 1_Fw                           | CCAACAACACCGCCATTCATAAATCTAGC | 93                   |
| HRM_Myb PAM 1_Rw                           | GCAAATCAGTAGTCTCGTAGGACCAGG   |                      |
| HRM_Myb PAM 2_Fw                           | GCATTGATGCTTCCGCAACTTACAG     | 106                  |
| HRM_Myb PAM 2_Rw                           | CCATCAGTTGTTGCCGCAACG         |                      |
| <b>Verification of Construct(plasmid)</b>  |                               |                      |
| Myb PAM 1 Fw                               | CTACACATCGGCAGCAACAC          | 544                  |
| M13 Rev                                    | CAGGAAACAGCTATGAC             |                      |
| Myb PAM 2 Fw                               | GACGTCCATGAGTTATCTCA          | 544                  |
| M13 Rev                                    | CAGGAAACAGCTATGAC             |                      |
| <b>Topo sequencing</b>                     |                               |                      |
| M13 Rev                                    | CAGGAAACAGCTATGAC             |                      |
| <b>Verification of marker free mutants</b> |                               |                      |
| dCas9 F1                                   | GAAGTACTCGATTGGATTGGAC        | 817                  |
| dCas9R1                                    | GAGGTCGTCGTCATATGTGTCT        |                      |
| OriFw                                      | GAATCAGGGATAACGCAGG           | 855                  |
| OriRw                                      | GCATTGGTAACTGTCAGACC          |                      |
| Phatr2_52110F(ENTPPL)                      | CGTTTGTGTGCTCCGTTCTA          | 188                  |
| Phatr2_52110R(ENTPPL)                      | CCTTAAGGCATTGGAGTCACTC        |                      |
| <b>qPCR</b>                                |                               |                      |
| qPCRphat_28684F                            | TGCGCTCGACACCATTTCOA          | 137                  |
| qPCRphat_28684R                            | GCTCCTTTGAAGATTGGACG          |                      |
| Phatr2_24186F                              | TCTCCGATACGGGCTTGGA           | 160                  |
| Phatr2_24186R                              | CAGCCGATCCGTCATAACTGC         |                      |
| dCas9R4                                    | ATATTCACCTTGCGGCATCGACA       | 97                   |
| dCas9F5                                    | TTATCGAGACAAACGGCGAAAC        |                      |

292

293

294
